# Supplementary material
Source: PubMed Central journal article supplement (PMC7726808)

For Figure 1A

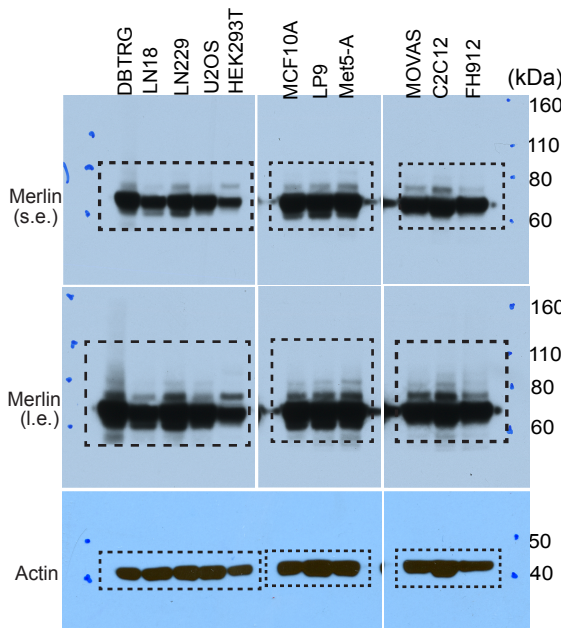

For Figure 1B

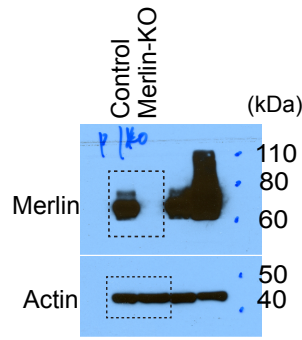

For Figure 1C

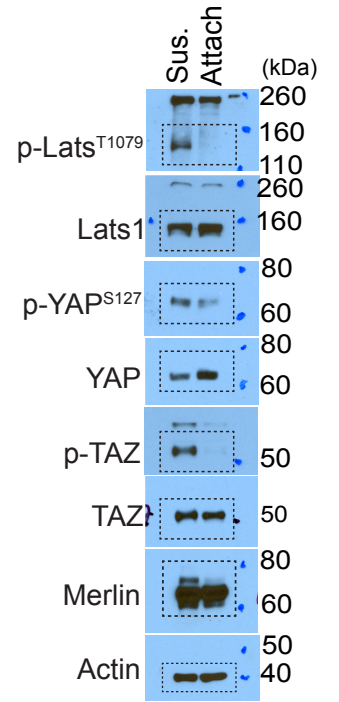

For Figure 1D

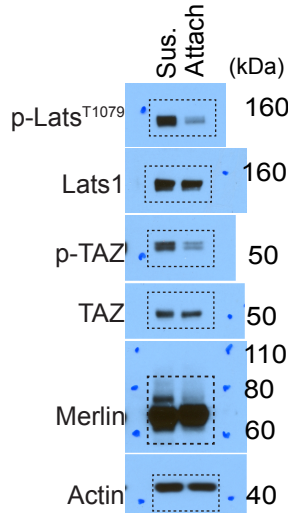

For Figure 1E

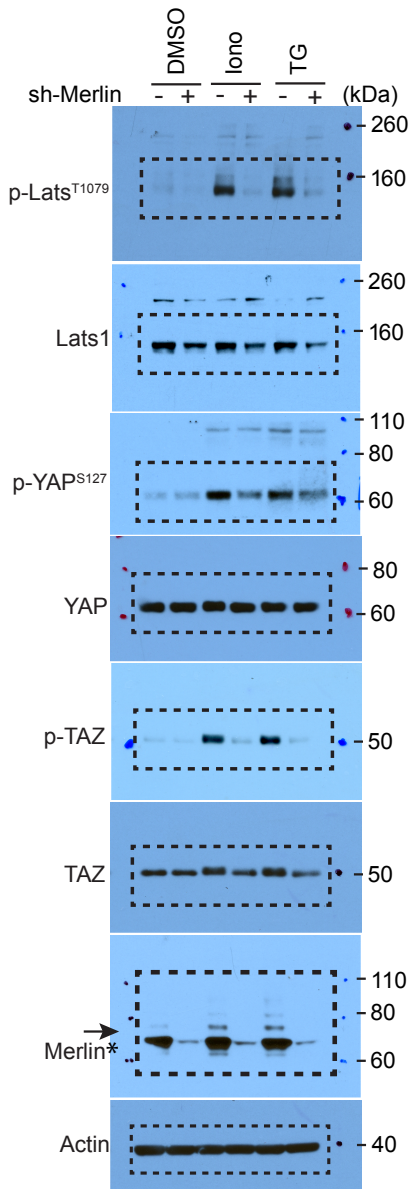

For Figure 1F

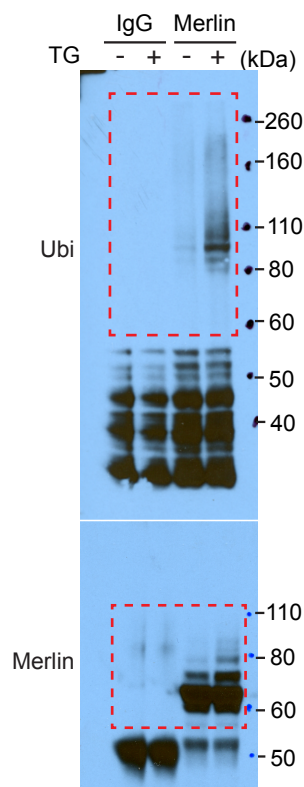

For Figure 1G

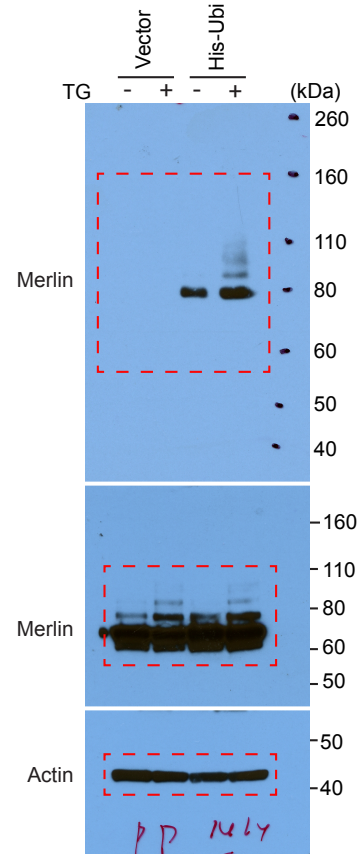

For Figure 1H

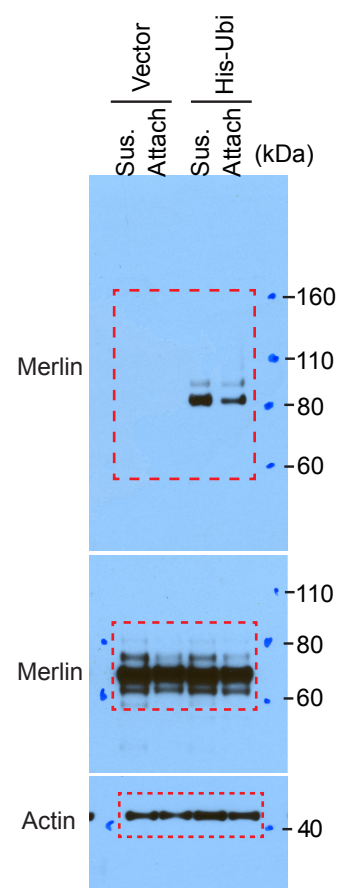

Supplement: EMBR-21-e50642-s002.pdf [file EMBR-21-e50642-s002.pdf]
