# Supplementary material
Source: PubMed Central journal article supplement (PMC7726808)

For Figure 2A

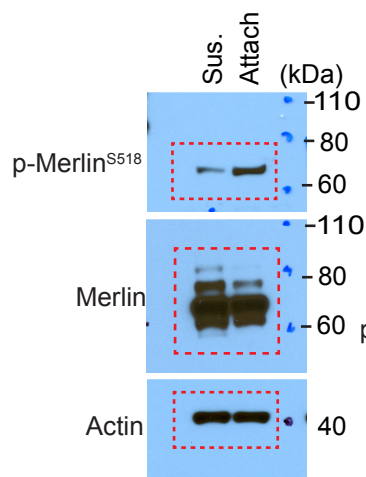

For Figure 2B

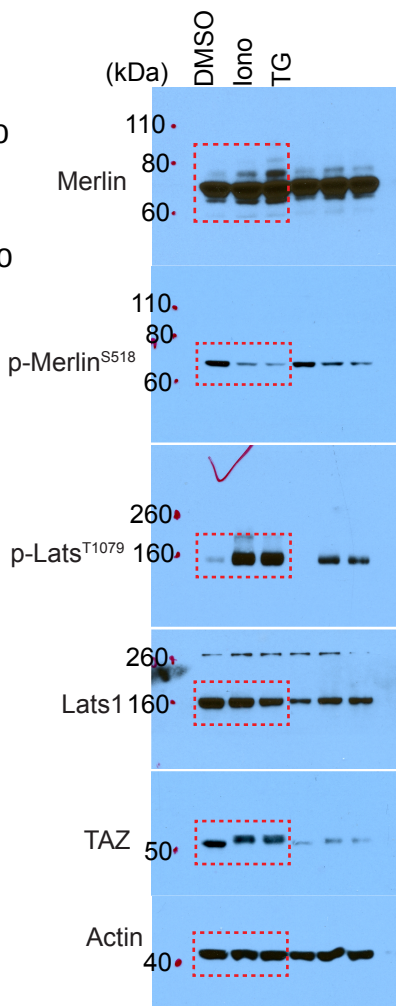

For Figure 2C

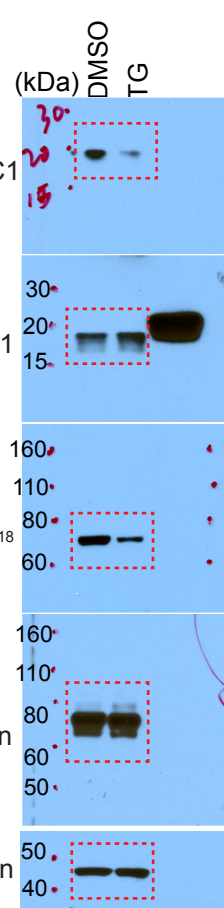

For Figure 2D

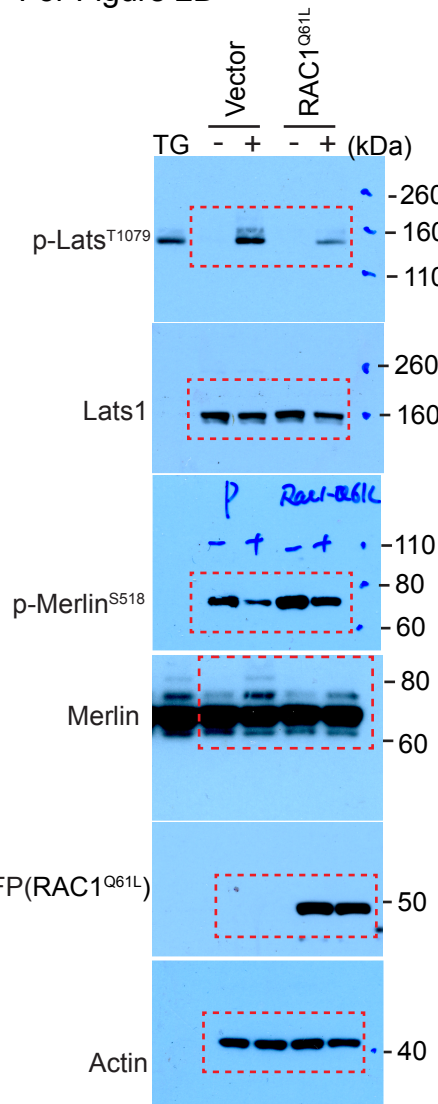

For Figure 2E

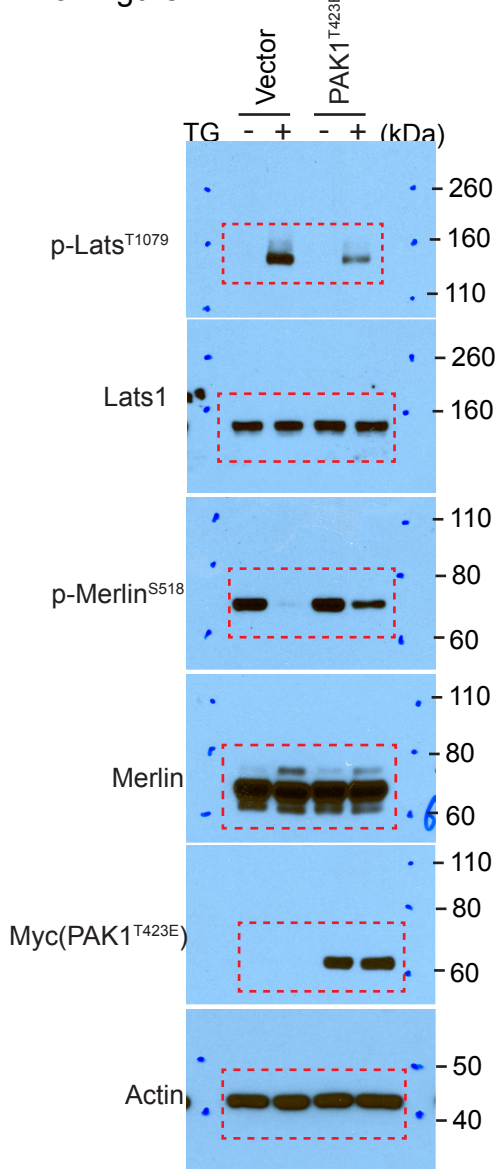

For Figure 2F

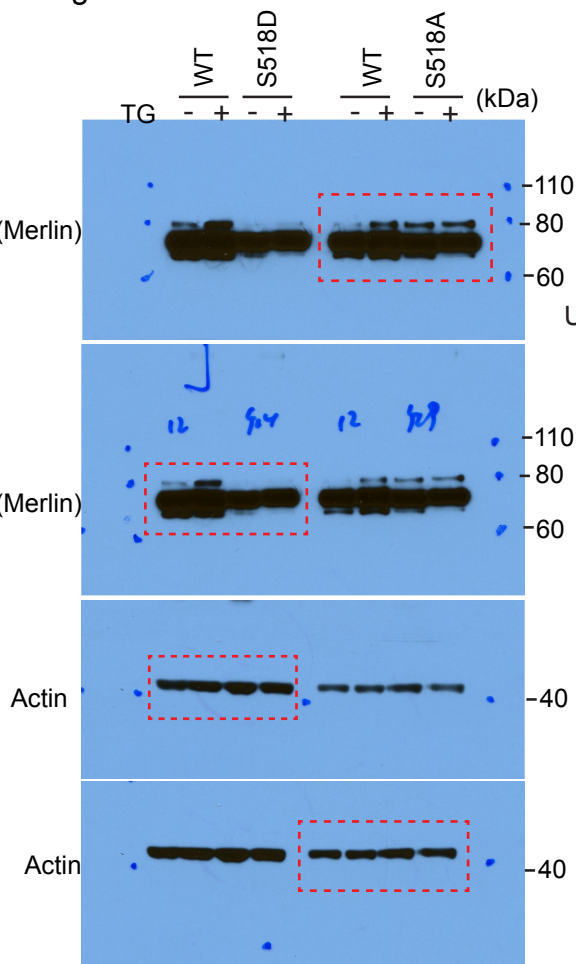

For Figure 2H

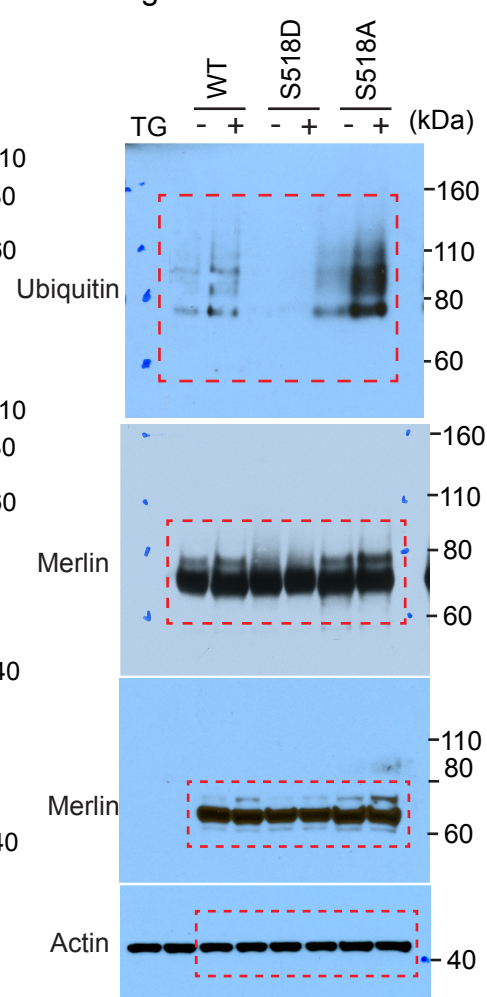

Supplement: EMBR-21-e50642-s003.pdf [file EMBR-21-e50642-s003.pdf]

For Figure 3B

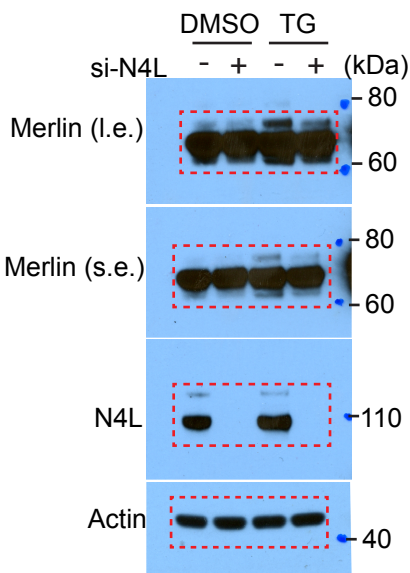

For Figure 3C

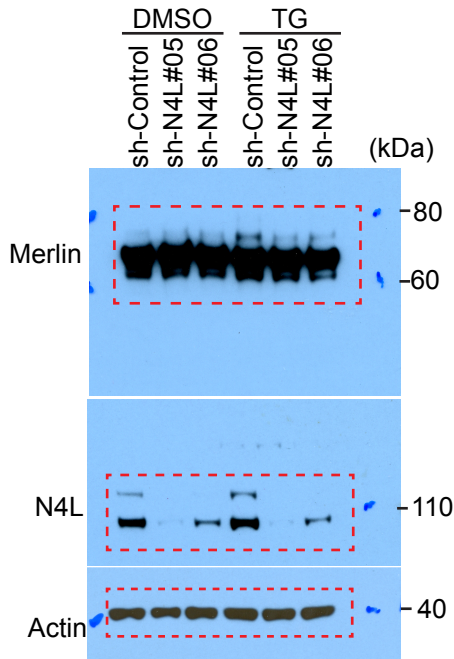

For Figure 3D

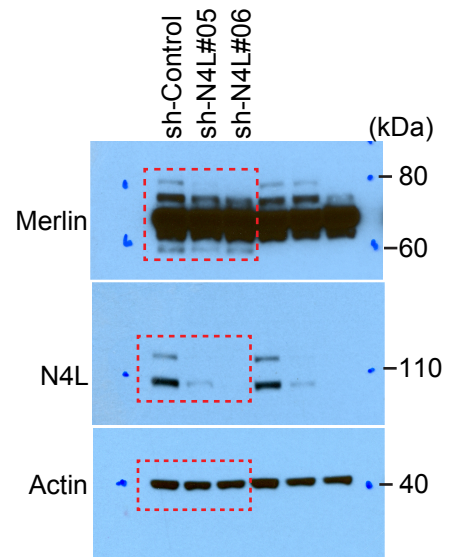

For Figure 3G

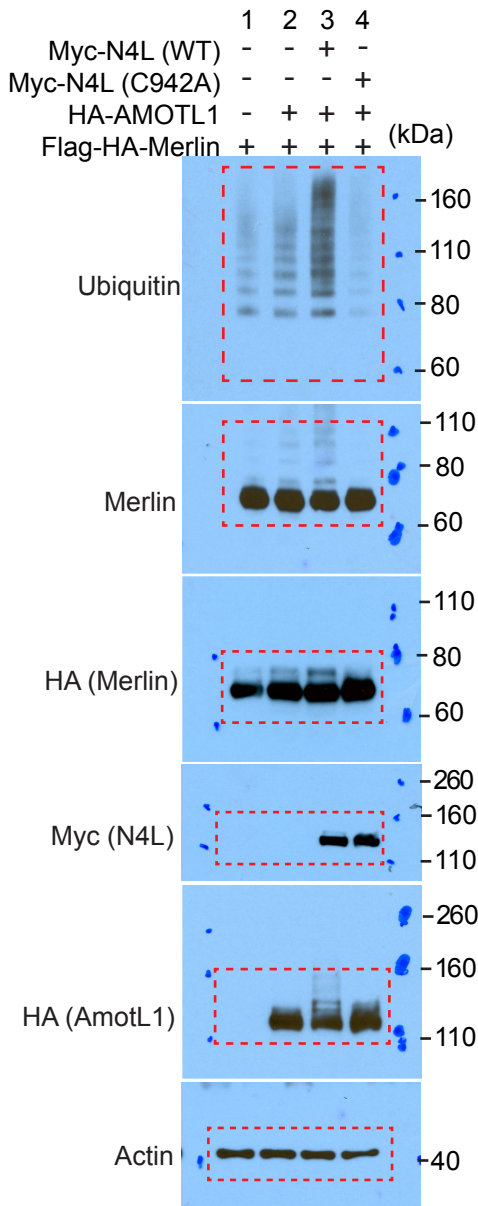

For Figure 3E

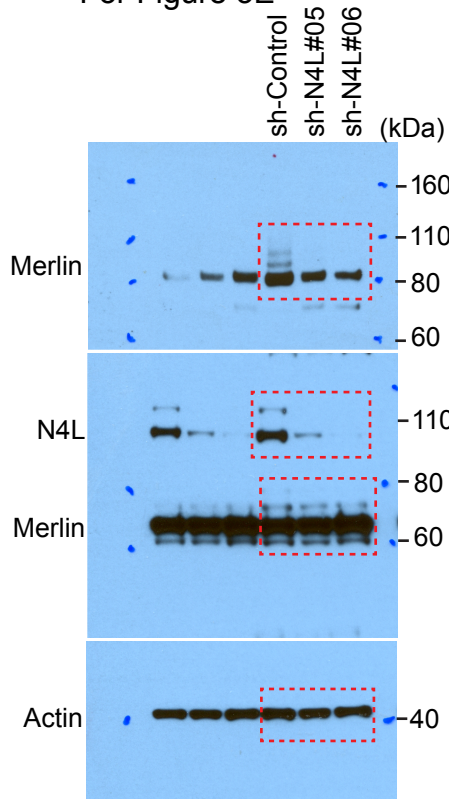

For Figure 3F

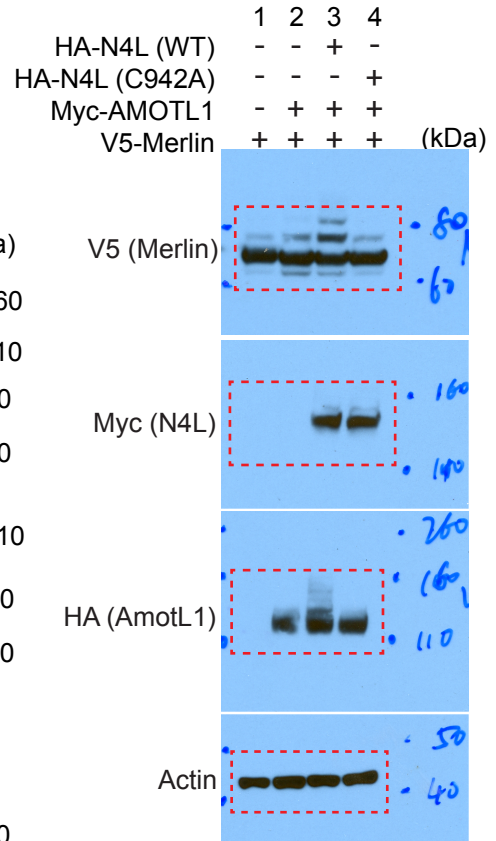

For Figure 3H

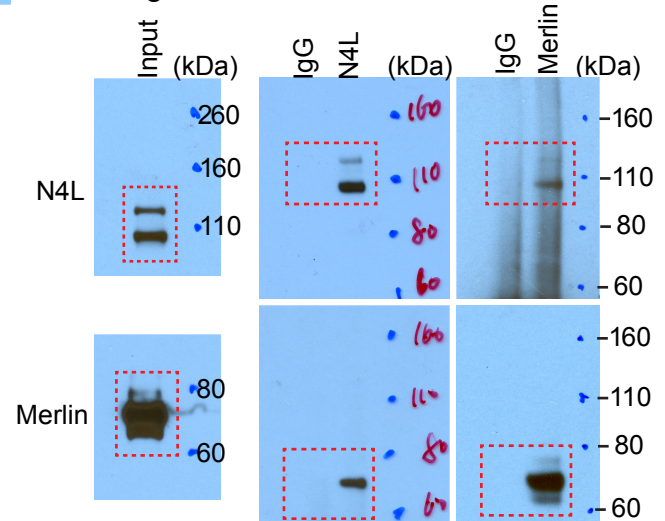

Supplement: EMBR-21-e50642-s004.pdf [file EMBR-21-e50642-s004.pdf]

For Figure 4A

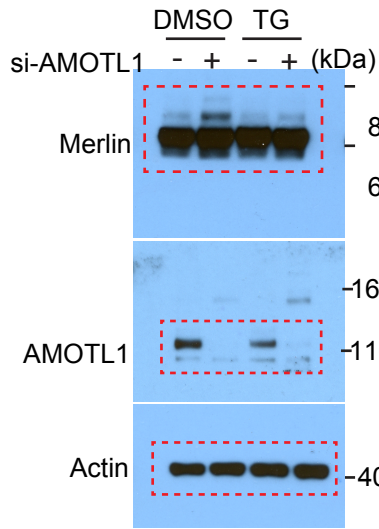

For Figure 4B

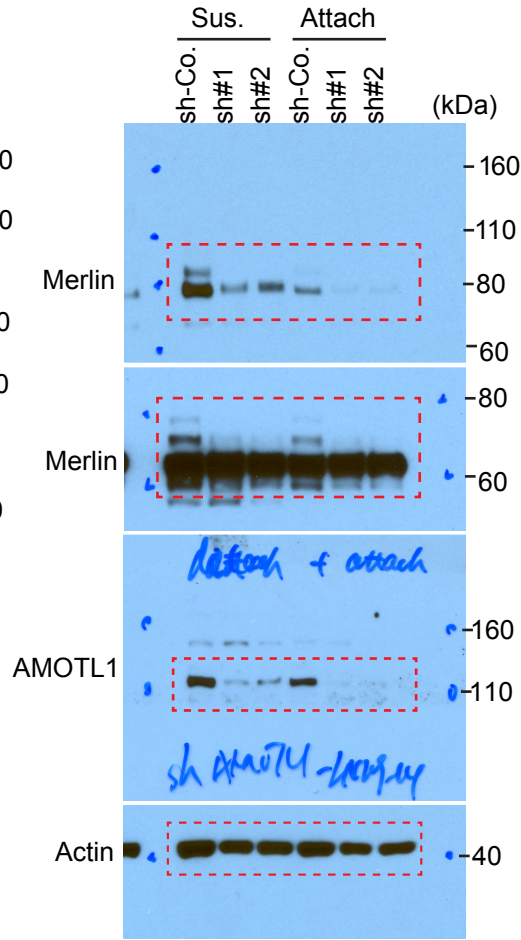

For Figure 4E

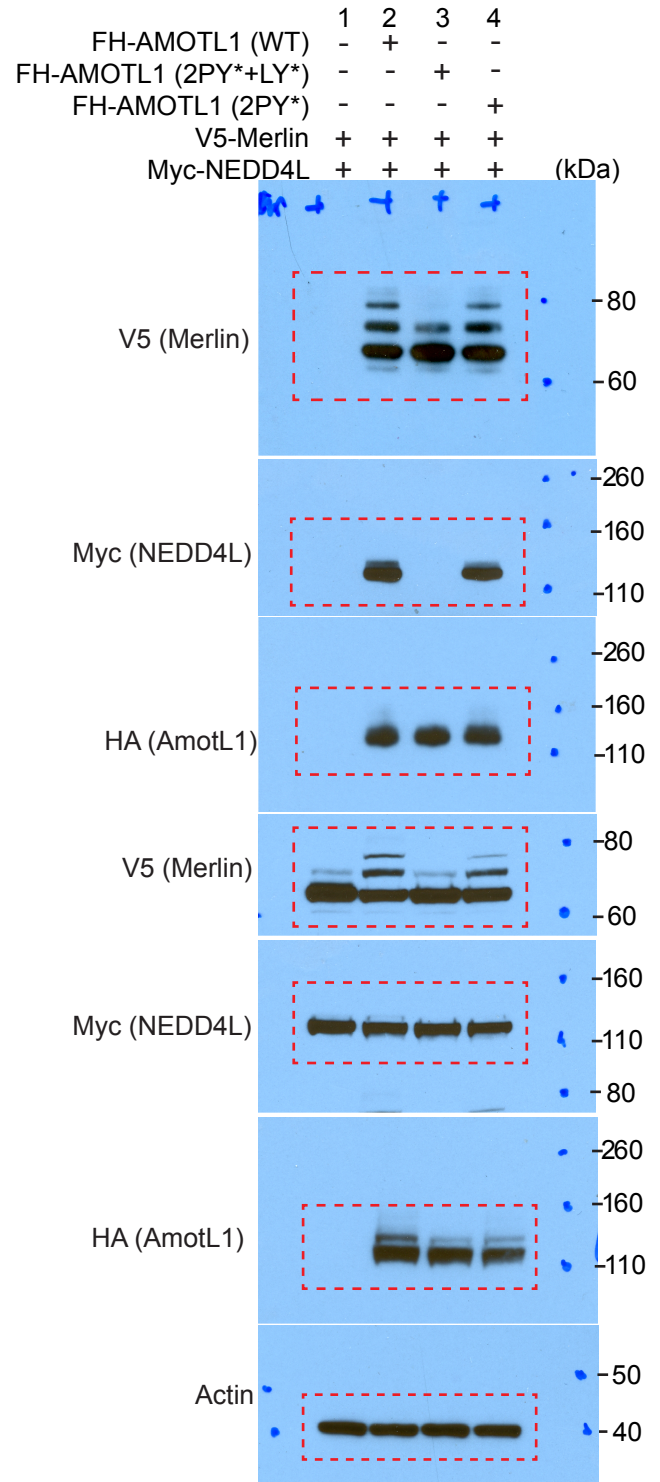

For Figure 4D

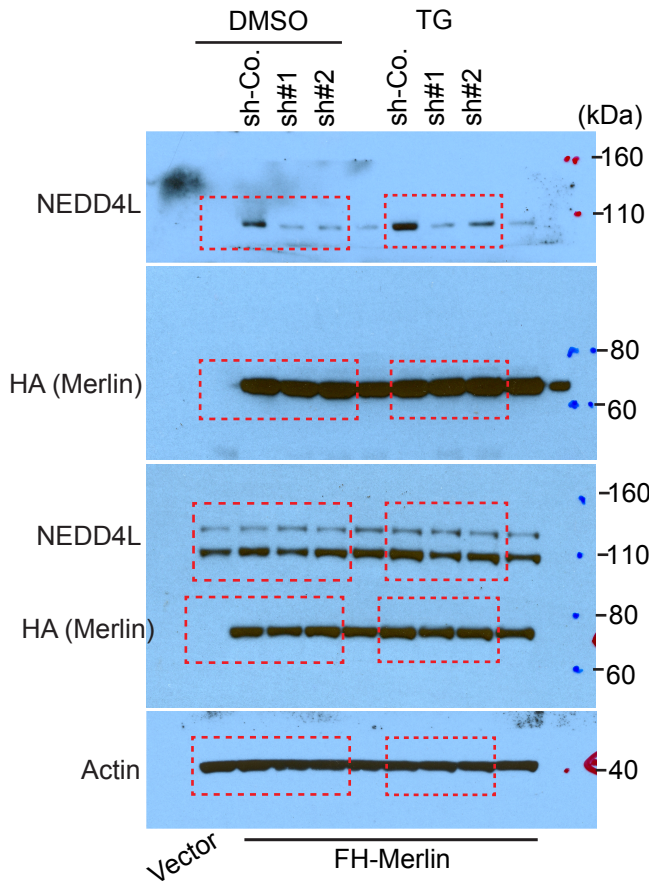

For Figure 4F

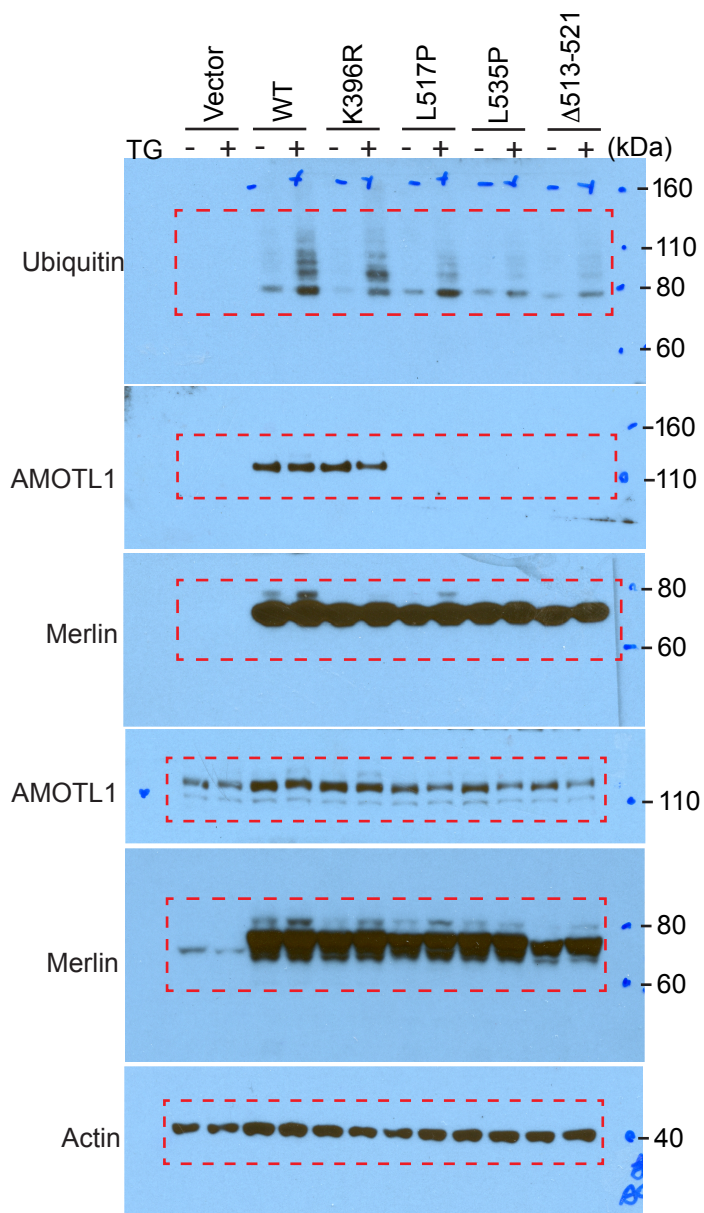

For Figure 4G

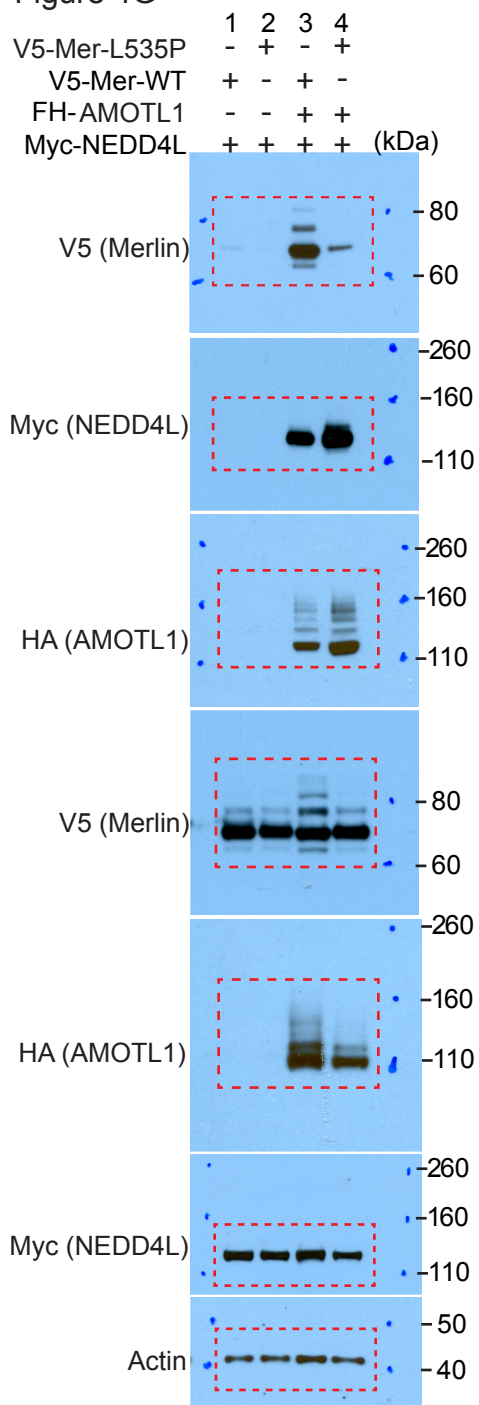

Supplement: EMBR-21-e50642-s005.pdf [file EMBR-21-e50642-s005.pdf]

For Figure 5F

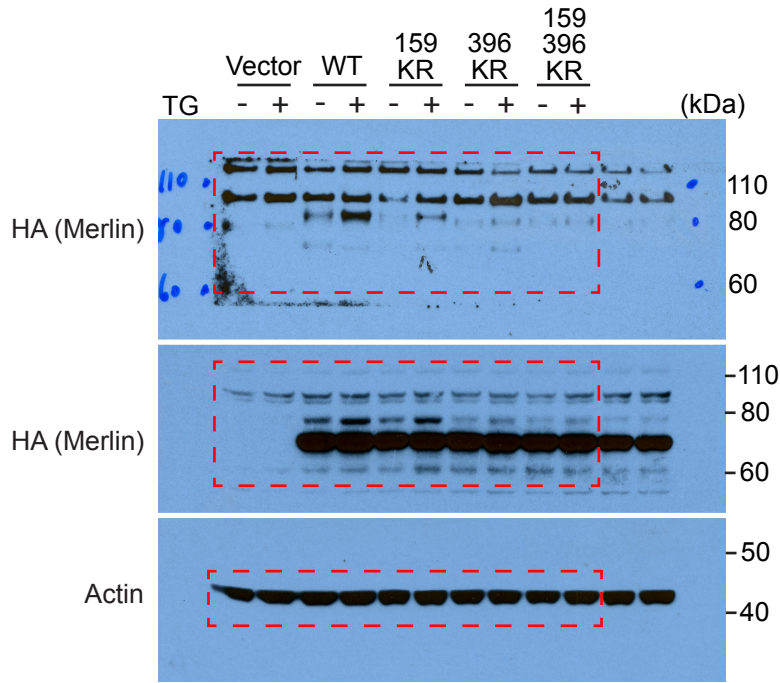

For Figure 5G

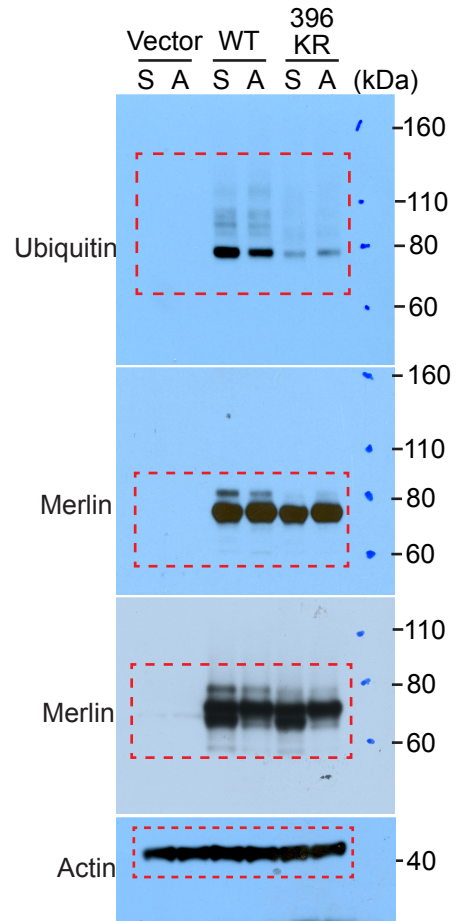

For Figure 5H

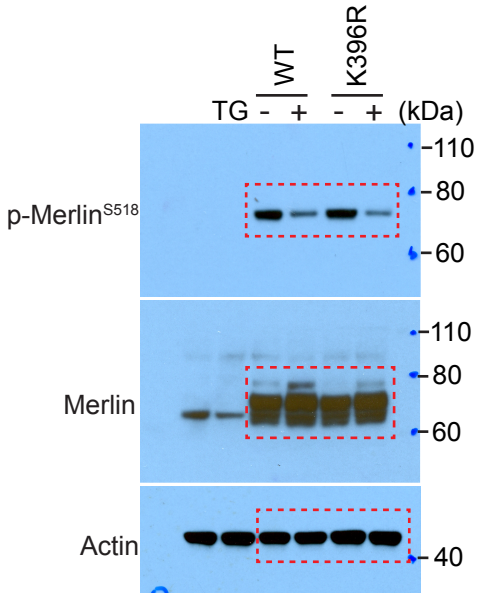

For Figure 5I

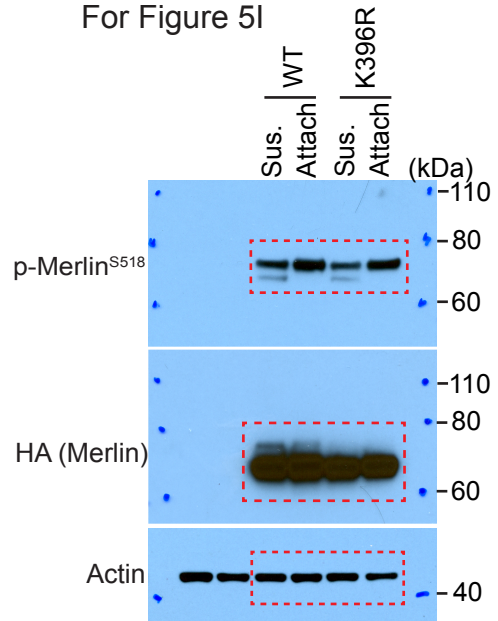

Supplement: EMBR-21-e50642-s006.pdf [file EMBR-21-e50642-s006.pdf]

For Figure 6A

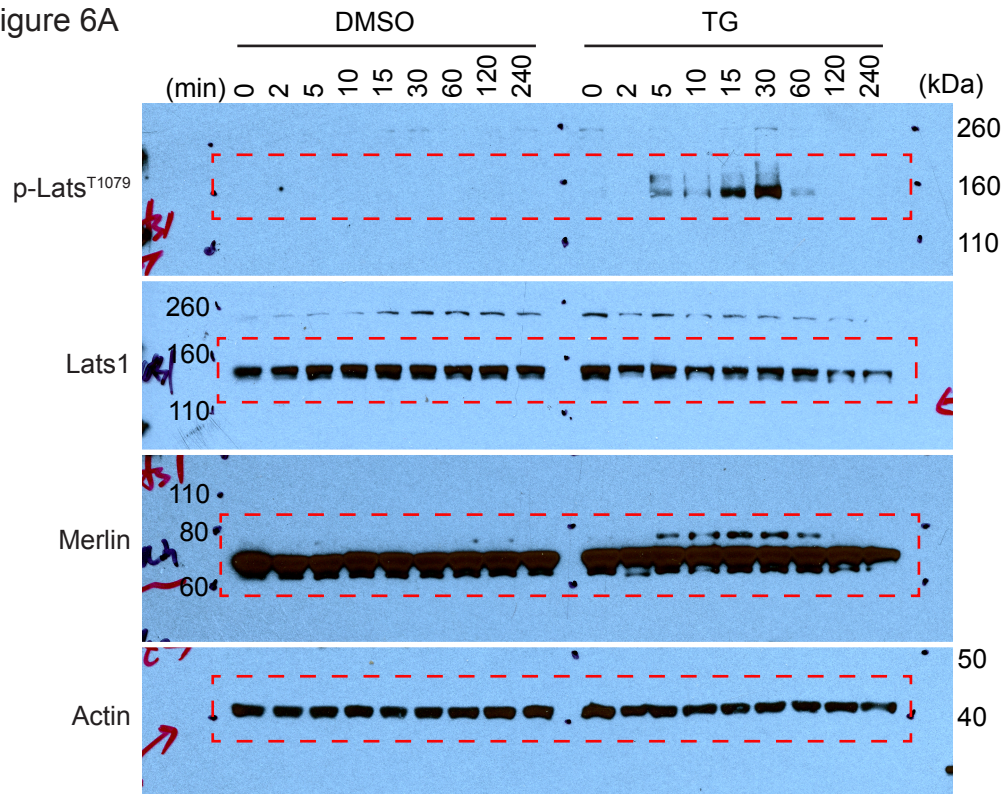

For Figure 6B

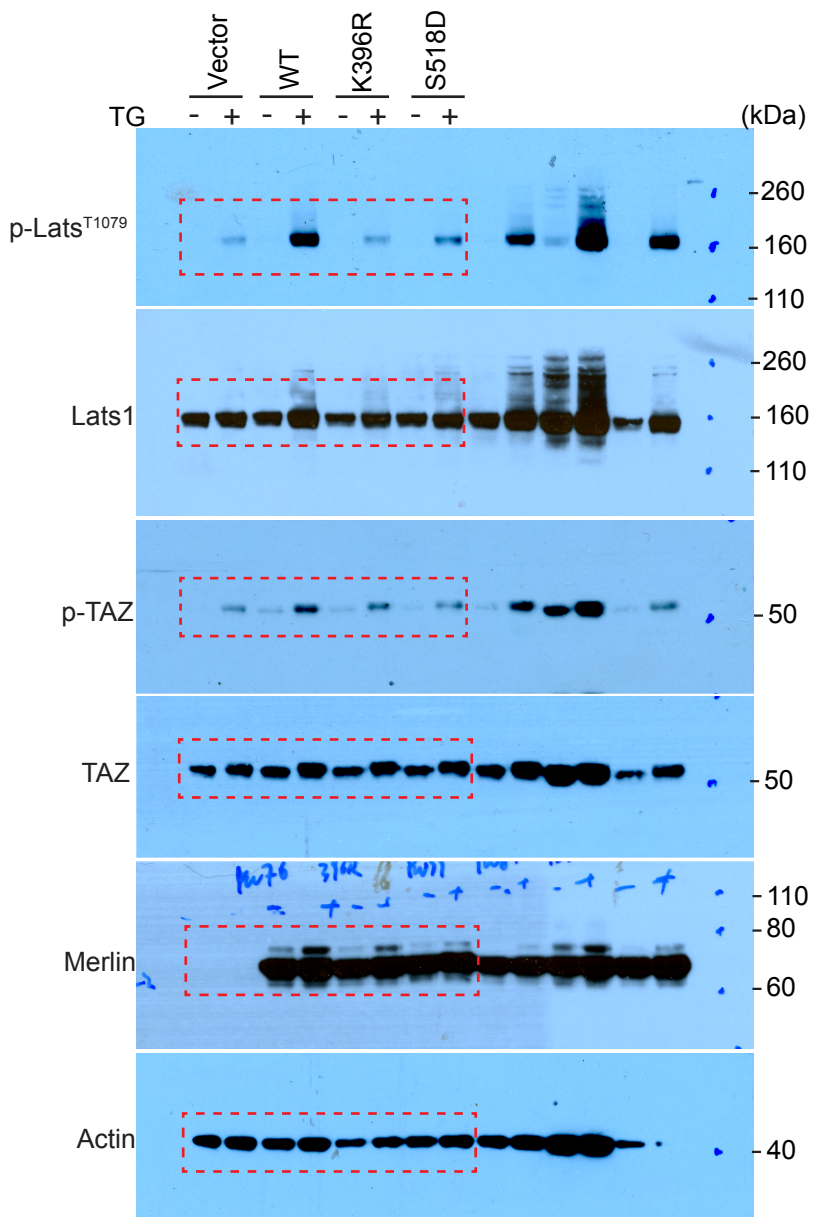

For Figure 6C

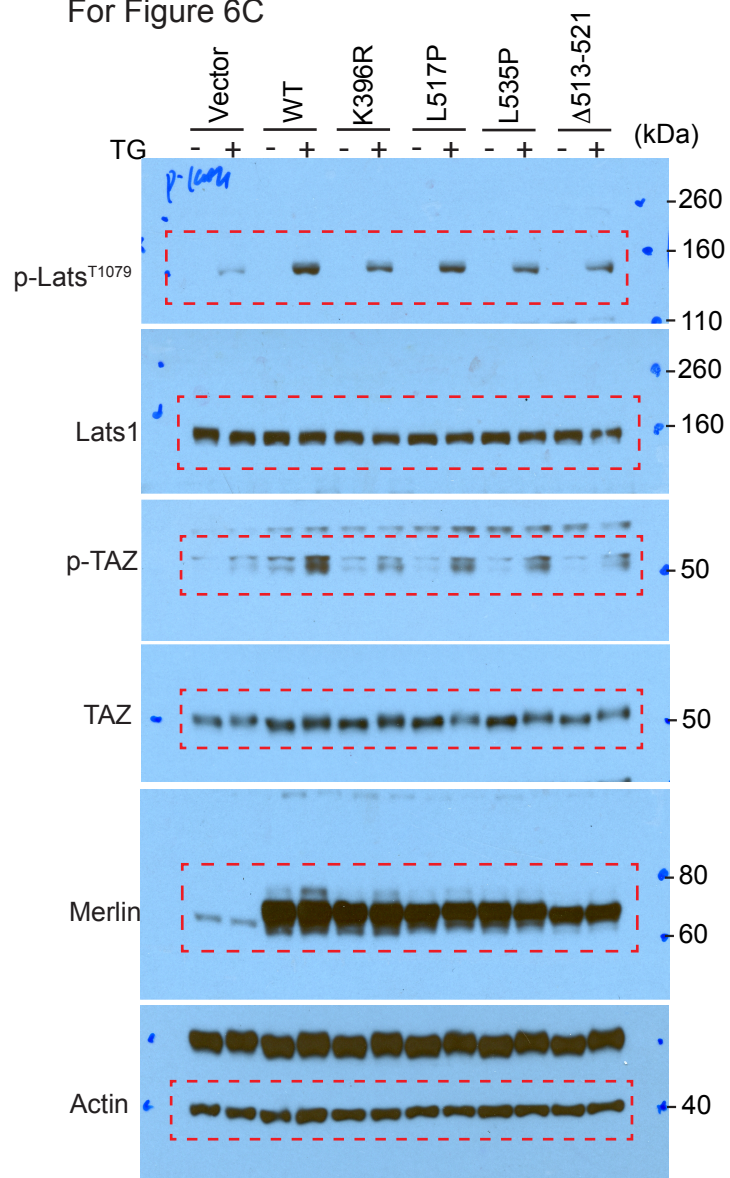

For Figure 6D

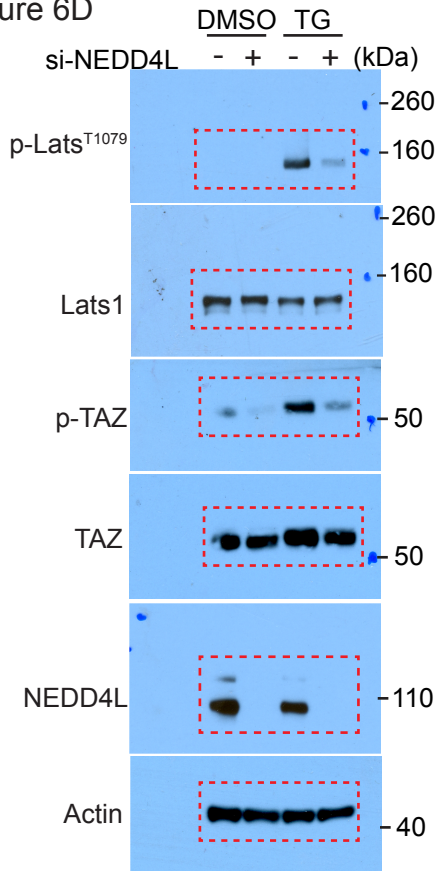

For Figure 6E

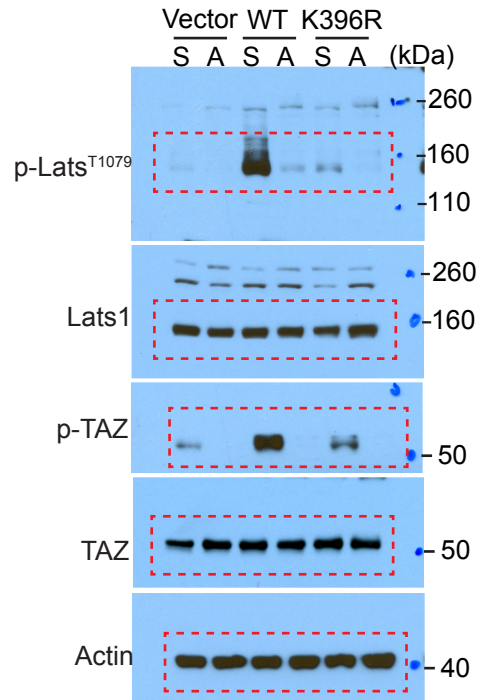

For Figure 6F

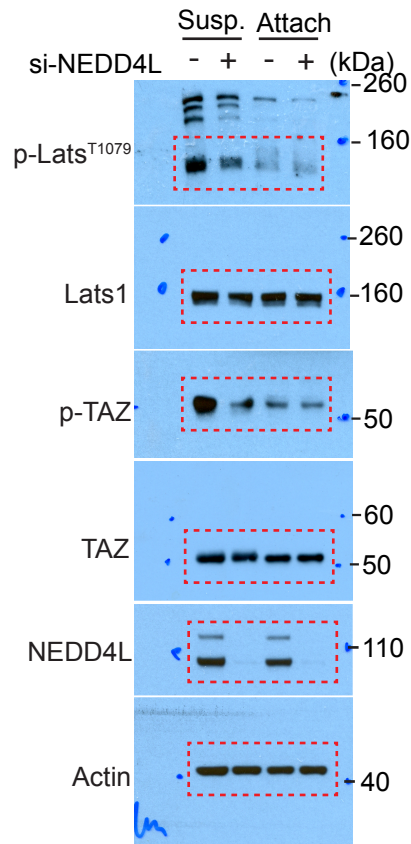

Supplement: EMBR-21-e50642-s007.pdf [file EMBR-21-e50642-s007.pdf]

For Figure 7E

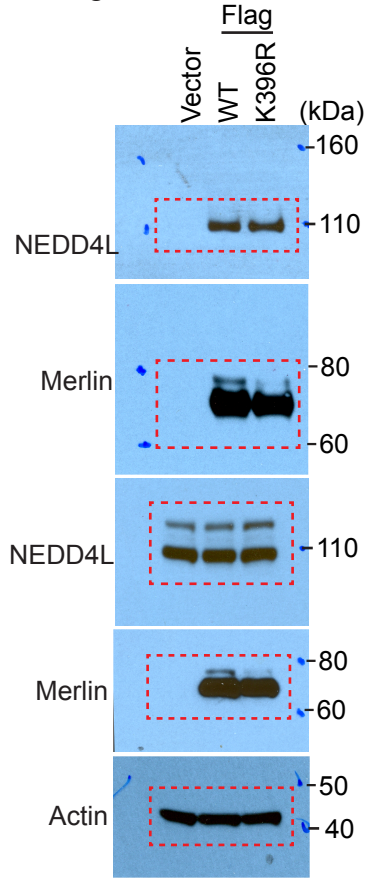

For Figure 7F

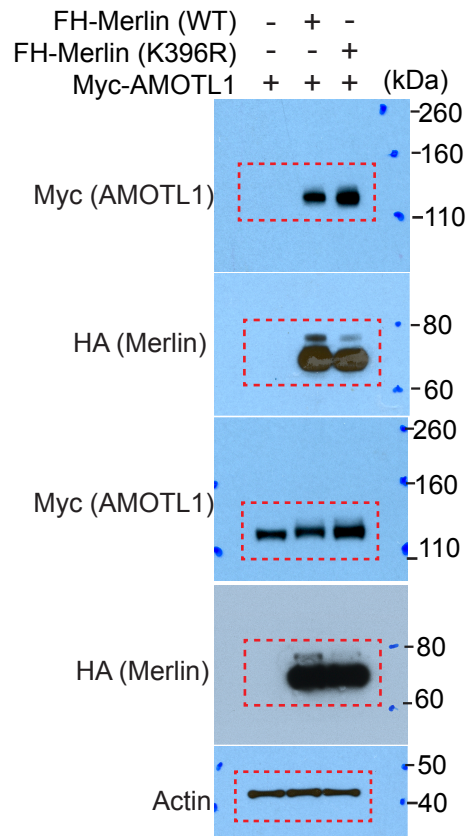

For Figure 7H

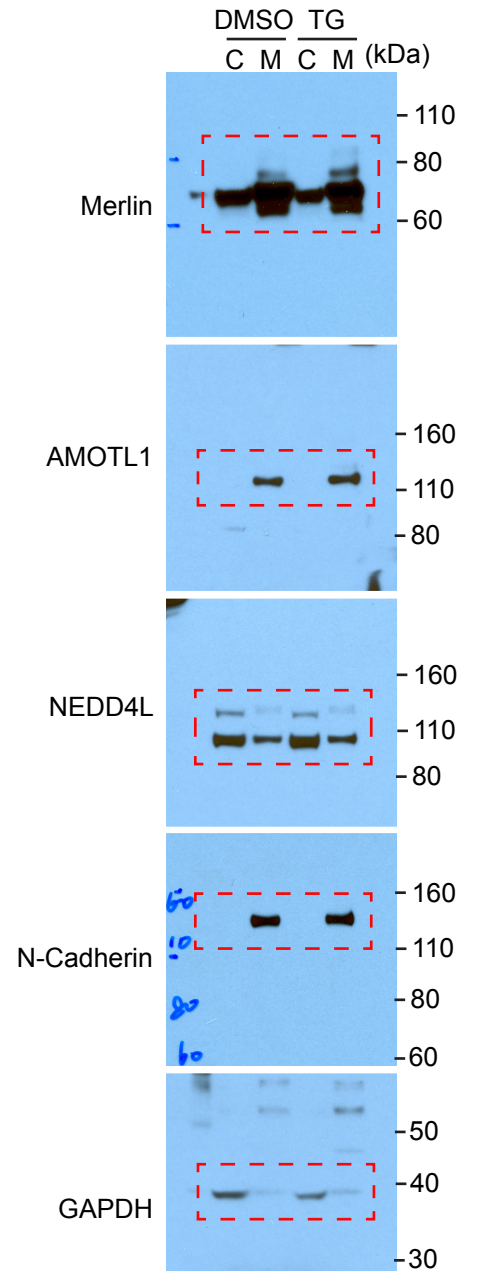

Supplement: EMBR-21-e50642-s008.pdf [file EMBR-21-e50642-s008.pdf]
